# Supplementary material for: The synthesis and electrochemical properties of low-crystallinity iron silicate derived from reed leaves as a supercapacitor electrode material
Source: Royal Society of Chemistry journal article supplement (doi:10.1039/d1dt01190a), 2021-01-01
Supplement: d1dt01190a1.pdf [file d1dt01190a1.pdf]

**Electronic supplementary information**

for

**Synthesis and Electrochemical Properties of Low-crystalline Iron Silicate Derived from Reed Leaves as a Supercapacitor Electrode Material**

Xingyu Chen, Yifu Zhang\*, Chen Wang, Xueying Dong, Changgong Meng\*

*State Key Laboratory of Fine Chemicals, School of Chemical Engineering, Dalian University of Technology, Dalian, 116024, China*

\*Corresponding authors.

Yifu Zhang: e-mail address: yfzhang@dlut.edu.cn, tel: +86-13654946624

Changgong Meng: e-mail address: cgmeng@dlut.edu.cn

**Figure S1**

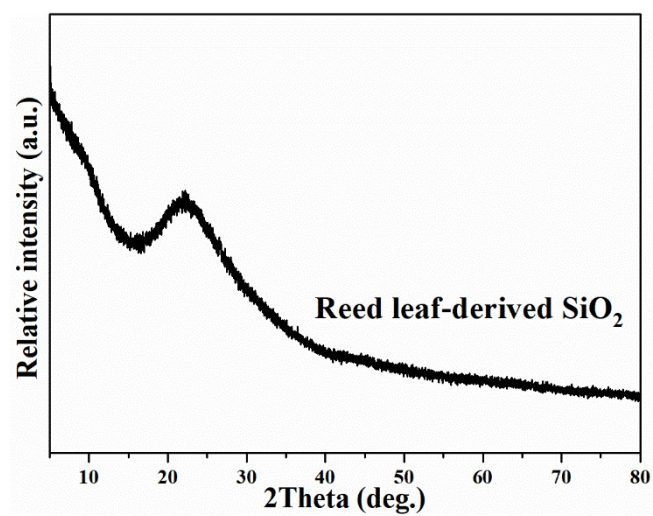

**Figure S1.** XRD pattern of SiO<sub>2</sub> derived from reed leaves.

Figure S2

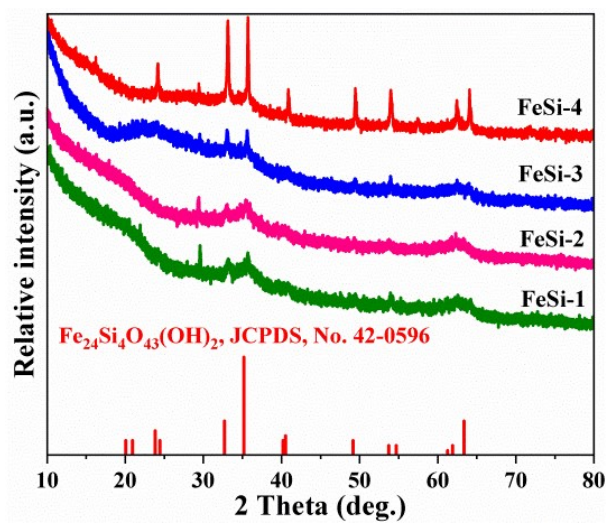

Figure S2. XRD pattern of FeSi 1-4

**Figure S3**

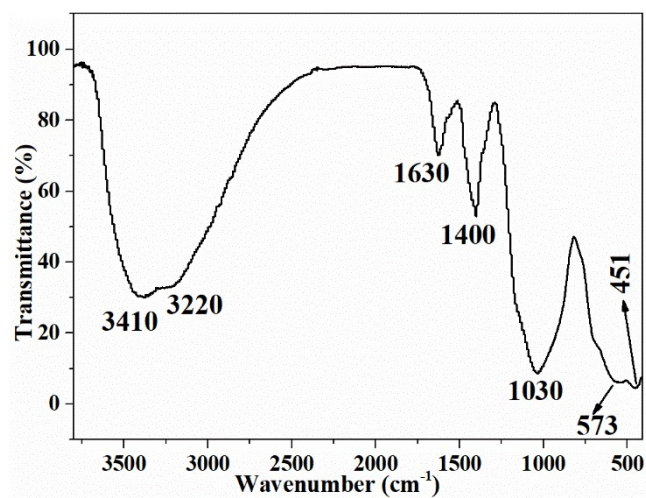

**Figure S3.** The FTIR spectrum of FeSi.

Figure S4

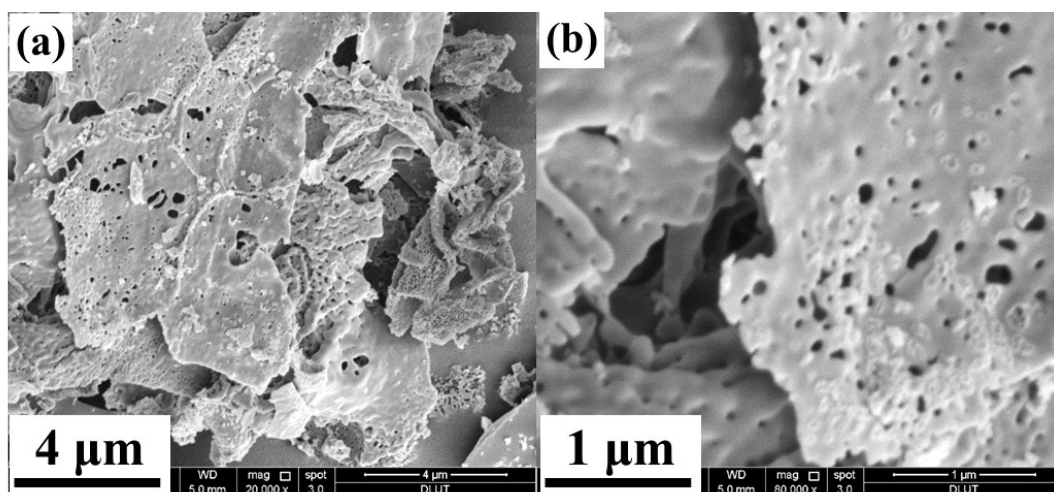

Figure S4. FE-SEM images of SiO<sub>2</sub> derived from reed leaves.

**Figure S5**

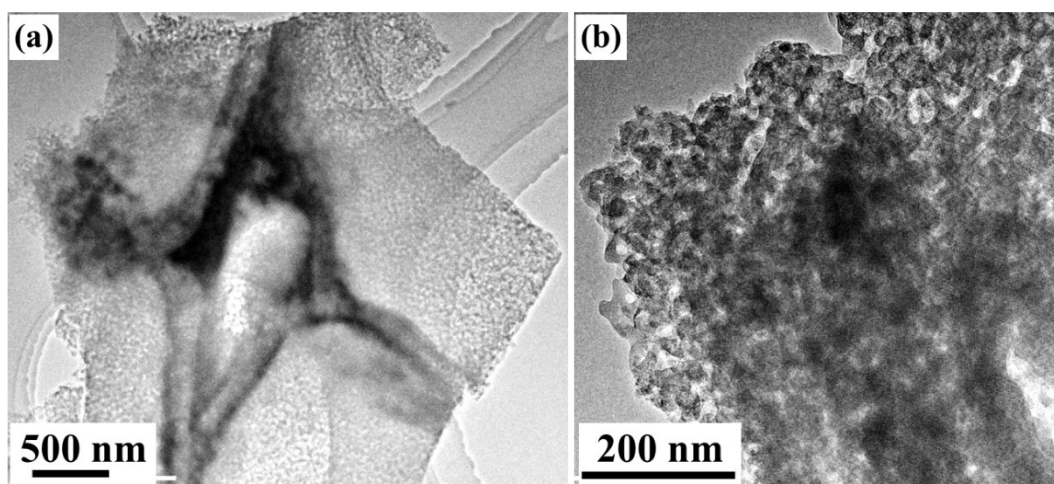

**Figure S5.** TEM images of SiO<sub>2</sub> derived from reed leaves.

**Figure S6**

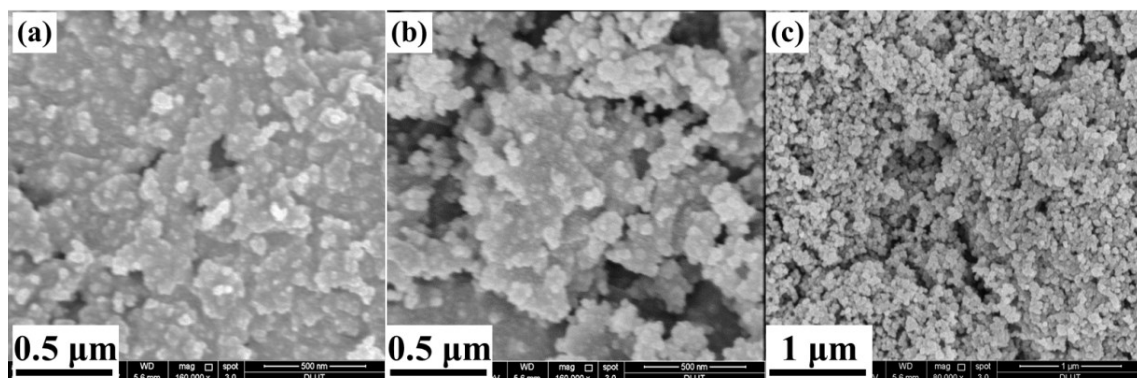

**Figure S6.** FE-SEM images of FeSi-1 (a), FeSi-2 (b), FeSi-4 (c)

Figure S7

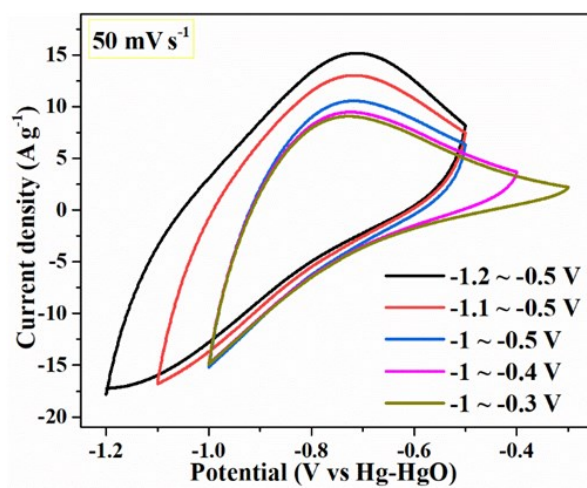

Figure S7. CV curves of FeSi in different voltage windows at 50 mV·s<sup>-1</sup>



Figure S8

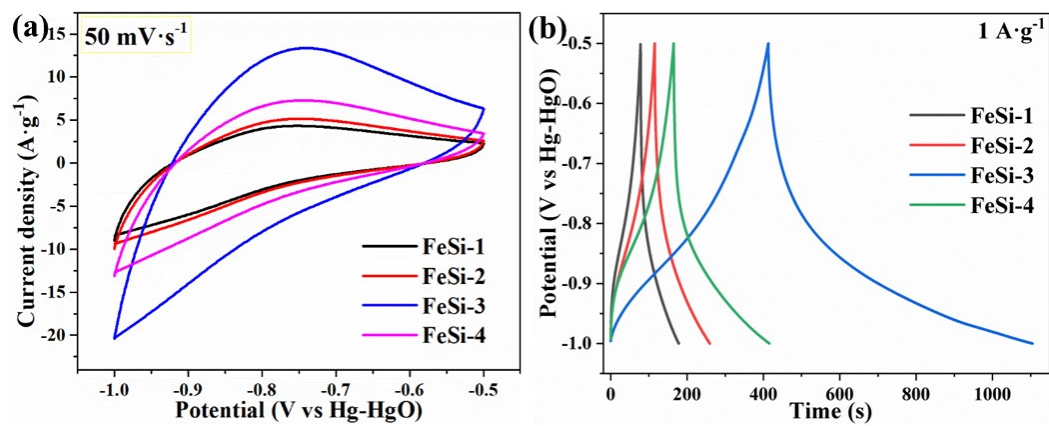

Figure S8. (a) CV curves of FeSi-1~4 at  $50 \text{ mV}\cdot\text{s}^{-1}$ ; (b) GCD curves of FeSi-1~4 at  $1 \text{ A}\cdot\text{g}^{-1}$ .

Figure S9

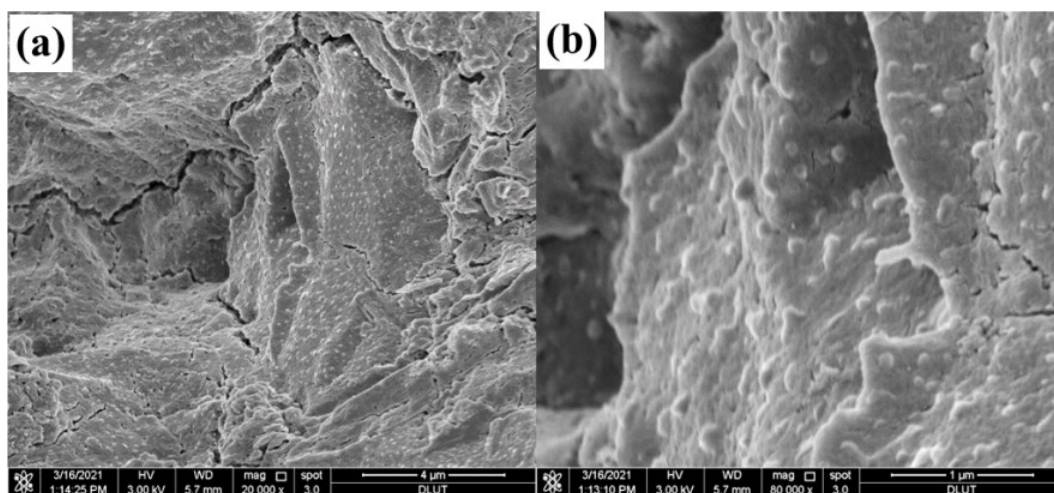

Figure S9. FE-SEM images of the FeSi electrode after 10000 cycles.

Figure S10

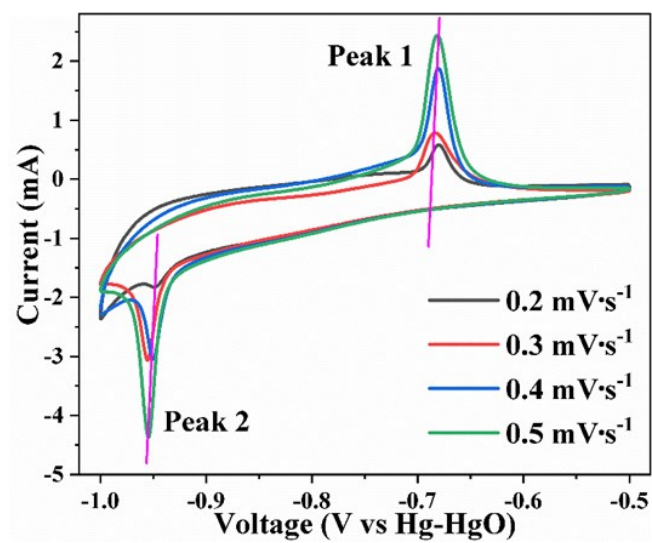

Figure S10. CV curves of FeSi at different scan rates from 0.2 to 0.5 mV·s<sup>-1</sup>.

**Table S1**

Table S1. Comparison of the electrochemical performance between FeSi and the reported silicate-based material

| Silicate-based materials                                                              | Electrolyte                         | Potential /V   | Capacitance                                       | Cycle                    | Ref.             |
|---------------------------------------------------------------------------------------|-------------------------------------|----------------|---------------------------------------------------|--------------------------|------------------|
| in situ CNT/nanoclay/PANI                                                             | 1 M KCl                             | 0~0.8          | 331 F·g <sup>-1</sup> , 10 mV·s <sup>-1</sup>     | 92%, 2000 cycles         | 1                |
| ex situ CNT/nanoclay/PANI                                                             | 1 M KCl                             | 0~0.8          | 202 F·g <sup>-1</sup> , 10 mV·s <sup>-1</sup>     | 92%, 2000 cycles         | 1                |
| Co <sub>x</sub> Ni <sub>3-x</sub> Si <sub>2</sub> O <sub>5</sub> (OH) <sub>4</sub> /C | 3 M KOH                             | -0.8~0.6       | 226 F·g <sup>-1</sup> , 0.5 A·g <sup>-1</sup>     | 99%, 10000 cycles        | 2                |
| C-zinc silicate                                                                       | 3 M KOH                             | -1~-0.3        | 450 mF·cm <sup>-2</sup> , 5 mV·s <sup>-1</sup>    | 83%, 10000 cycles        | 3                |
| Ni <sub>3</sub> Si <sub>2</sub> O <sub>5</sub> (OH) <sub>4</sub>                      | 3 M KOH                             | -0.1~-0.3      | 132.4 F·g <sup>-1</sup> , 0.5 A·g <sup>-1</sup>   | 100%, 10000 cycles       | 4                |
| C-MnSi                                                                                | 3 M KOH                             | -0.1~0.55      | 511 F·g <sup>-1</sup> , 0.5 A·g <sup>-1</sup>     | 84%, 10000 cycles        | 5                |
| Co <sub>2</sub> SiO <sub>4</sub>                                                      | 3 M KOH                             | 0~0.5          | 453 F·g <sup>-1</sup> , 0.5 A·g <sup>-1</sup>     | 89%, 10000 cycles        | 6                |
| MnSiO <sub>3</sub>                                                                    | 3 M KOH                             | -0.5~0.2       | 517 F·g <sup>-1</sup> , 0.5 A·g <sup>-1</sup>     | 34%, 10000 cycles        | 6                |
| Ni <sub>3</sub> Si <sub>2</sub> O <sub>5</sub> (OH) <sub>4</sub>                      | 3 M KOH                             | 0~0.6          | 67 F·g <sup>-1</sup> , 0.5 A·g <sup>-1</sup>      | 44%, 10000 cycles        | 6                |
| CoSi NBs@MnO <sub>2</sub>                                                             | 3 M KOH                             | -0.5~0.6       | 490.5 F·g <sup>-1</sup> , 1 A·g <sup>-1</sup>     | 80%, 5000 cycles         | 7                |
| CSO NN/RGO                                                                            | 3 M KOH                             | -0.1~0.55      | 483 F·g <sup>-1</sup> , 0.5 A·g <sup>-1</sup>     | 58%, 10000 cycles        | 8                |
| e-CoSi-3                                                                              | 6 M KOH                             | 0~0.5          | 267 F·g <sup>-1</sup> , 1 A·g <sup>-1</sup>       | 90%, 10000 cycles        | 9                |
| e-NiSi-3                                                                              | 6 M KOH                             | 0~0.5          | 272 F·g <sup>-1</sup> , 1 A·g <sup>-1</sup>       | 96%, 10000 cycles        | 9                |
| e-MnSi-3                                                                              | 6 M KOH                             | 0~0.5          | 439 F·g <sup>-1</sup> , 1 A·g <sup>-1</sup>       | 80%, 10000 cycles        | 9                |
| C/Co <sub>3</sub> Si <sub>2</sub> O <sub>5</sub> (OH) <sub>4</sub>                    | 3 M KOH                             | -0.05~0.4      | 1600 F·g <sup>-1</sup> , 1 A·g <sup>-1</sup>      | 91%, 6000 cycles         | 10               |
| Ni <sub>3</sub> Si <sub>2</sub> O <sub>5</sub> (OH) <sub>4</sub> /GO                  | 3 M KOH                             | 0.1~0.55       | 165 F·g <sup>-1</sup> , 0.5 A·g <sup>-1</sup>     | 84%, 5000 cycles         | 11               |
| nt-MnSiO <sub>3</sub> /rGO                                                            | 3 M KOH                             | -0.6~0.6       | 860 F·g <sup>-1</sup> , 0.5 A·g <sup>-1</sup>     | 80%, 5000 cycles         | 12               |
| (Ni, Co) <sub>3</sub> Si <sub>2</sub> O <sub>5</sub> (OH) <sub>4</sub>                | 1 M KOH                             | 0-0.5          | 144 F·g <sup>-1</sup> , 1 A·g <sup>-1</sup>       | 99%, 10000 cycles        | 13               |
| MnSiO <sub>3</sub> /MWCNTs                                                            | 1 M Na <sub>2</sub> SO <sub>4</sub> | -0.2-0.8       | 236 F·g <sup>-1</sup> , 0.5 A·g <sup>-1</sup>     | 41%, 1000 cycles         | 14               |
| CoSi hollow sphere                                                                    | 3 M KOH                             | 0-0.5          | 452.8 F·g <sup>-1</sup> , 0.5 A·g <sup>-1</sup>   | 89%, 10,000 cycles       | 15               |
| NiSi hollow sphere                                                                    | 3 M KOH                             | 0-0.6          | 66.7 F·g <sup>-1</sup> , 0.5 A·g <sup>-1</sup>    | 44%, 5000 cycles         | 15               |
| CoNiSi/C                                                                              | 3 M KOH                             | -0.8~0.6       | 226 F·g <sup>-1</sup> , 0.5 A·g <sup>-1</sup>     | 99%, 10000 cycles        | 16               |
| MnSiO <sub>x</sub> /C                                                                 | 3 M KOH                             | -1~-0.3        | 162 F·g <sup>-1</sup> , 0.5 A·g <sup>-1</sup>     | 85%, 10000 cycles        | 17               |
| CoSi NBs@MnO <sub>2</sub>                                                             | 3 M KOH                             | -0.5~0.6       | 490.4 F·g <sup>-1</sup> , 1.0 A·g <sup>-1</sup>   | 45%, 5000 cycles         | 18               |
| Mn <sub>3</sub> O <sub>4</sub> doped MnSi/C                                           | 3 M KOH                             | -0.9~0.4       | 108 F·g <sup>-1</sup> , 1 A·g <sup>-1</sup>       | 82%, 8400 cycles         | 19               |
| NiSi-Ni(OH) <sub>2</sub>                                                              | 3 M KOH                             | 0.1~0.6        | 476 F·g <sup>-1</sup> , 2 A·g <sup>-1</sup>       | 103%, 10000 cycles       | 20               |
| Co <sub>2</sub> SiO <sub>4</sub> @Ni(OH) <sub>2</sub>                                 | 3 M KOH                             | -0.1~0.55      | 1101 F·g <sup>-1</sup> , 1.0 A·g <sup>-1</sup>    | 46%, 4000 cycles         | 21               |
| Co <sub>3</sub> (Si <sub>2</sub> O <sub>5</sub> ) <sub>2</sub> (OH) <sub>2</sub>      | 6 M KOH                             | 0.1~0.55       | 237 F·g <sup>-1</sup> , 5.7 mA·cm <sup>-2</sup>   | 95%, 150 cycles          | 22               |
| Ni <sub>3</sub> Si <sub>2</sub> O <sub>5</sub> (OH) <sub>4</sub>                      | 6 M KOH                             | 0~0.5          | 887 F·g <sup>-1</sup> , 0.7 A·g <sup>-1</sup>     | 97%, 2000 cycles         | 23               |
| Mesoporous-Li <sub>2</sub> MnSiO <sub>4</sub>                                         | 2 M KOH                             | 0~0.55         | 150 F·g <sup>-1</sup> , 0.5 A·g <sup>-1</sup>     | 86%, 500 cycles          | 24               |
| Manganese silicate drapes                                                             | 1 M KOH                             | -0.5~0.4       | 283 F·g <sup>-1</sup> , 0.5 A·g <sup>-1</sup>     | 75%, 1000 cycles         | 25               |
| Ni <sub>3</sub> Si <sub>2</sub> O <sub>5</sub> (OH) <sub>4</sub> spheres              | 2 M KOH                             | 0.2~0.6        | 138 F·g <sup>-1</sup> , 1 A·g <sup>-1</sup>       | —                        | 26               |
| MnSiO <sub>3</sub>                                                                    | 6 M KOH                             | 0.2~0.6        | 251 F·g <sup>-1</sup> , 0.6 A·g <sup>-1</sup>     | —                        | 27               |
| <b>FeSi</b>                                                                           | <b>3 M KOH</b>                      | <b>-1~-0.5</b> | <b>575 F·g<sup>-1</sup>, 0.5 A·g<sup>-1</sup></b> | <b>76%, 10000 cycles</b> | <b>This work</b> |

## References

1. R. Oraon, A. De Adhikari, S. K. Tiwari and G. C. Nayak, *ACS Sustain. Chem. Eng.*, 2016, **4**, 1392-1403.
2. Z. Yifu, W. Chen, J. Hanmei, W. Qiushi, Z. Jiqi and M. Changgong, *Chemical Engineering Journal*, 2019, DOI: 10.1016/j.cej.2019.121938.
3. Y. Zhang, H. Jiang, Q. Wang and C. Meng, *Chem. Eng. J.*, 2018, **352**, 519-529.
4. W. Qiushi, Z. Yifu, J. Hanmei, H. Tao and M. Changgong, *ACS Applied Energy Materials*, 2018, DOI: 10.1021/acsaem.8b00556.
5. Y. Cheng, Y. Zhang and C. Meng, *ACS Appl. Energy Mater.*, 2019, **2**, 3830-3839.
6. Q. Wang, Y. Zhang, H. Jiang, X. Li, Y. Cheng and C. Meng, *Chem. Eng. J.*, 2019, **362**, 818-829.
7. Z. Yunfeng, Z. Yifu, C. Yan, T. Fuping, J. Hanmei, D. Xueying and M. Changgong, *Colloids and Surfaces A: Physicochemical and Engineering Aspects*, 2020, DOI: 10.1016/j.colsurfa.2020.124951.
8. C. Yan, Z. Yifu, J. Hanmei, D. Xueying, M. Changgong and K. Zongkui, *Journal of Power Sources*, 2019, DOI: 10.1016/j.jpowsour.2019.227407.
9. Y. Zhang, C. Wang, X. Dong, H. Jiang, T. Hu, C. Meng and C. Huang, *Chem. Eng. J.*, 2021, DOI: <https://doi.org/10.1016/j.cej.2020.127964>, 127964.
10. X. Li, S. Ding, X. Xiao, J. Shao, J. Wei, H. Pang and Y. Yu, *J. Mater. Chem. A*, 2017, **5**, 12774-12781.
11. X. Dong, Y. Zhang, Q. Wang, X. Zhang, M. Gao and M. Changgong, *Dalton Trans.*, 2019, **48**, 11749-11762.
12. D. Xueying, Z. Yifu, C. Qiang, J. Hanmei, W. Qiushi, M. Changgong and K. Zongkui, *Sustainable Energy & Fuels*, 2020, DOI: 10.1039/d0se00042f.
13. R. Qing, L. Lu-Lu, Z. Xing, H. Yu-Xi and Y. Han-Qing, *Appl. Energy*, 2014, **153**, 63-69.
14. W. Qiushi, Z. Yifu, J. Shengzhe, H. Yuhang, X. Jingshu, L. Fen and M. Changgong, *Colloids and Surfaces A: Physicochemical and Engineering Aspects*, 2018, DOI: 10.1016/j.colsurfa.2018.03.072.
15. W. Qiushi, Z. Yifu, J. Hanmei, L. Xiaojuan, C. Yan and M. Changgong, *Chemical Engineering Journal*, 2019, DOI: 10.1016/j.cej.2019.01.102.
16. Y. Zhang, C. Wang, H. Jiang, Q. Wang, J. Zheng and C. Meng, *Chem. Eng. J.*, 2019, **375**,

- 121938.
17. Q. Wang, Y. Zhang, H. Jiang and C. Meng, *J. Colloid Interface Sci.*, 2019, **534**, 142-155.
  18. Y. Zhao, Y. Zhang, Y. Cheng, F. Tian, H. Jiang, X. Dong and C. Meng, *Colloid Surf. A-Physicochem. Eng. Asp.*, 2020, **600**, 124951.
  19. H. Jiang, Y. Zhang, C. Wang, Q. Wang, C. Meng and J. Wang, *Inorg. Chem. Front.*, 2019, **6**, 2788-2800.
  20. Q. Wang, Y. Zhang, J. Xiao, H. Jiang, X. Li and C. Meng, *Mater. Chem. Front.*, 2019, **3**, 2090-2101.
  21. Y. Zhao, Y. Zhang, Y. Cheng, W. Zhao, W. Chen, C. Meng and C. Huang, *Mater. Lett.*, 2021, **282**, 128774.
  22. G.-Q. Zhang, Y.-Q. Zhao, F. Tao and H.-L. Li, *J. Power Sources*, 2006, **161**, 723-729.
  23. J. Zhao, Y. Zhang, T. Wang, P. Li, C. Wei and H. Pang, *Adv. Mater. Interfaces*, 2015, **2**, 1400377.
  24. P. Chaturvedi, A. Kumar, A. Sil and Y. Sharma, *RSC Adv.*, 2015, **5**, 25156-25163.
  25. H.-Y. Wang, Y.-Y. Wang, X. Bai, H. Yang, J.-P. Han, N. Lun, Y.-X. Qi and Y.-J. Bai, *RSC Adv.*, 2016, **6**, 105771-105779.
  26. Y. Zhang, W. Zhou, H. Yu, T. Feng, Y. Pu, H. Liu, W. Xiao and L. Tian, *Nanoscale Res. Lett.*, 2017, **12**, 325.
  27. C. Tian, S. Zhao and Q. Lu, *Ceram. Inter.*, 2018, **44**, 17007-17012.
